# Supplementary material for: Controllable self-assemblies of sodium benzoate in different solvent environments
Source: Royal Society of Chemistry journal article supplement (doi:10.1039/c5ra13026c), 2015-01-01
Supplement: c5ra13026c1.pdf [file c5ra13026c1.pdf]

## Controllable self-assemblies of sodium benzoate in different solvents environments

Mingfang Ma <sup>a †</sup>, Jinge Gu <sup>a †</sup>, Minmin Yang<sup>a</sup>, Zhaolou Li<sup>b</sup>, Zhuoqun Lu<sup>a</sup>, Yimeng Zhang<sup>a</sup>, Pengyao Xing<sup>a</sup>, Shangyang Li<sup>a</sup>, Xiaoxiao Chu<sup>a</sup>, Yajie Wang<sup>a</sup>, Qi Li<sup>a</sup>, Minyan Lin<sup>a</sup> and Aiyu Hao<sup>a\*</sup>

<sup>a</sup>Key Laboratory of Colloid and Interface Chemistry of Ministry of Education and School of Chemistry and Chemical Engineering, Shandong University, Jinan 250100, P. R. China.

<sup>b</sup>School of Basic Sciences, Jining Medical University, Jining 272067, P. R. China.

### Supporting Information

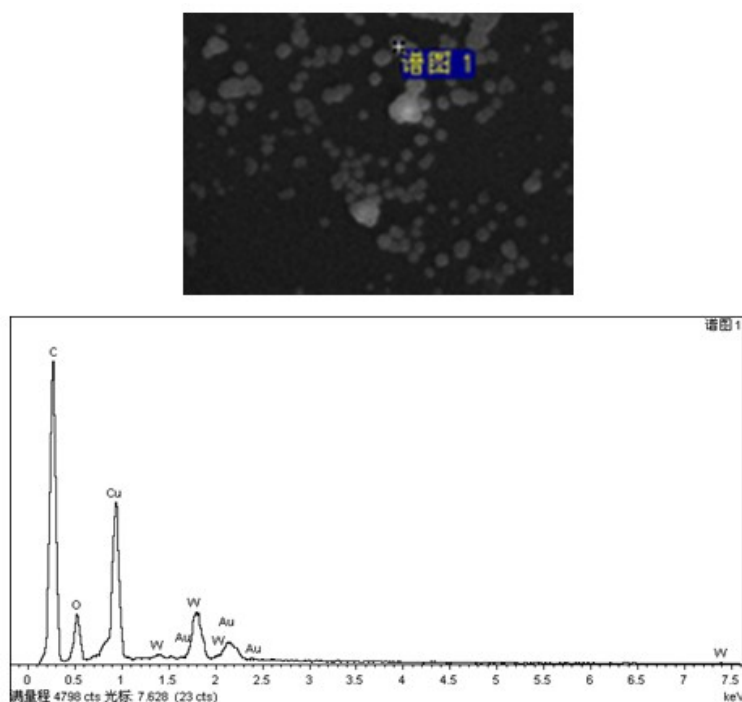

**Fig. S1** EDS spectrum of sodium benzoate vesicles.

\* Corresponding author: Aiyu Hao. Tel.: +86-531-88363306; Fax: +86-531-88564464; E-mail: [haoay@sdu.edu.cn](mailto:haoay@sdu.edu.cn)

<sup>†</sup>These authors contributed equally

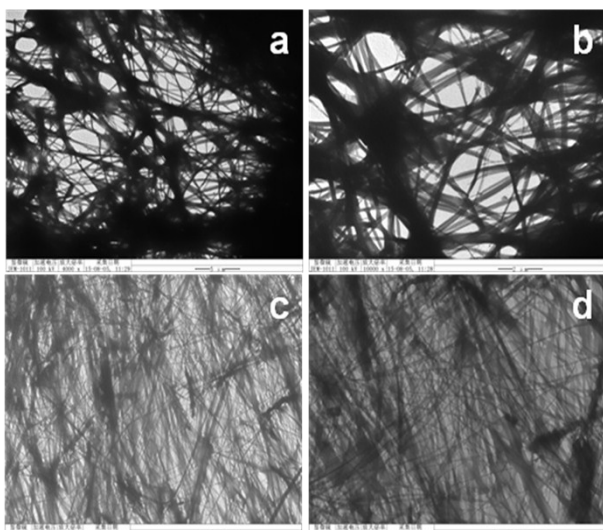

**Fig. S2** TEM images of sodium benzoate gel at room temperature: (a) & (b), water/ acetonitrile; (c) & (d), water/ isopropanol.

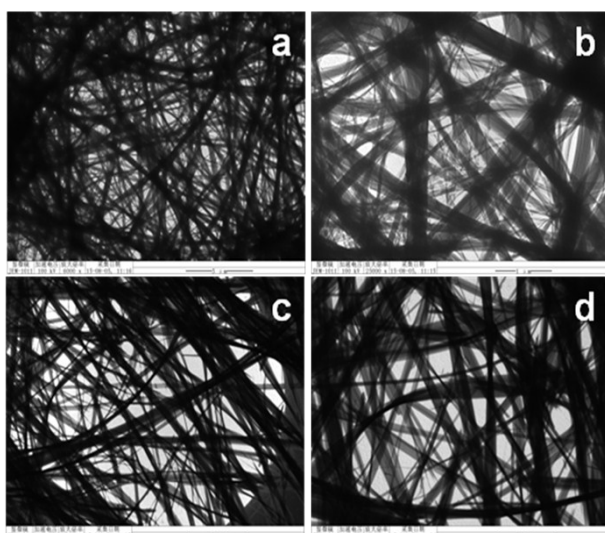

**Fig. S3** TEM images of sodium benzoate gel at room temperature: (a) & (b), water/dimethyl formamide; (c) & (d), water/ dimethylsulfoxide.

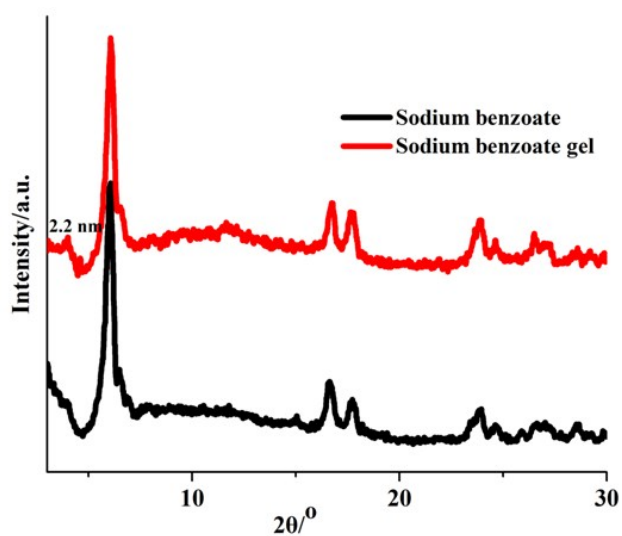

**Fig. S4** XRD pattern comparisons of sodium benzoate and sodium benzoate gel.

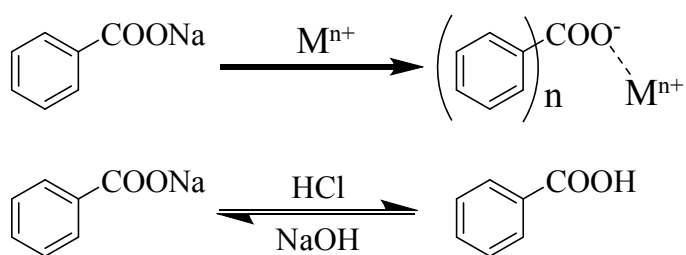

**Fig. S5** The complex model of metal ions with sodium benzoate and pH-dependent equilibrium between sodium benzoate and benzoic acid.

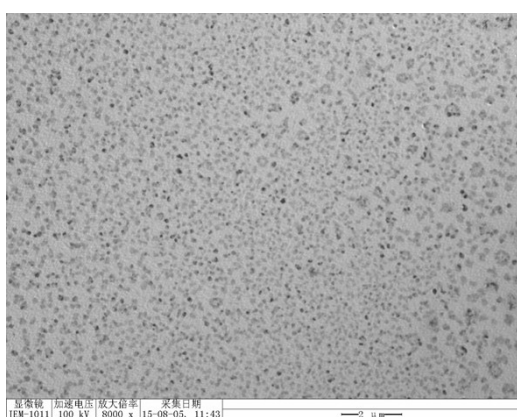

**Fig. S6** TEM images of calf serum, scale bar = 2 μm.
